# Supplementary material for: Genetic Regulation of Bone Metabolism in the Chicken: Similarities and Differences to Mammalian Systems
Source: PubMed Central journal article supplement (PMC4449198; doi:10.1371/journal.pgen.1005250), 2015-05-29

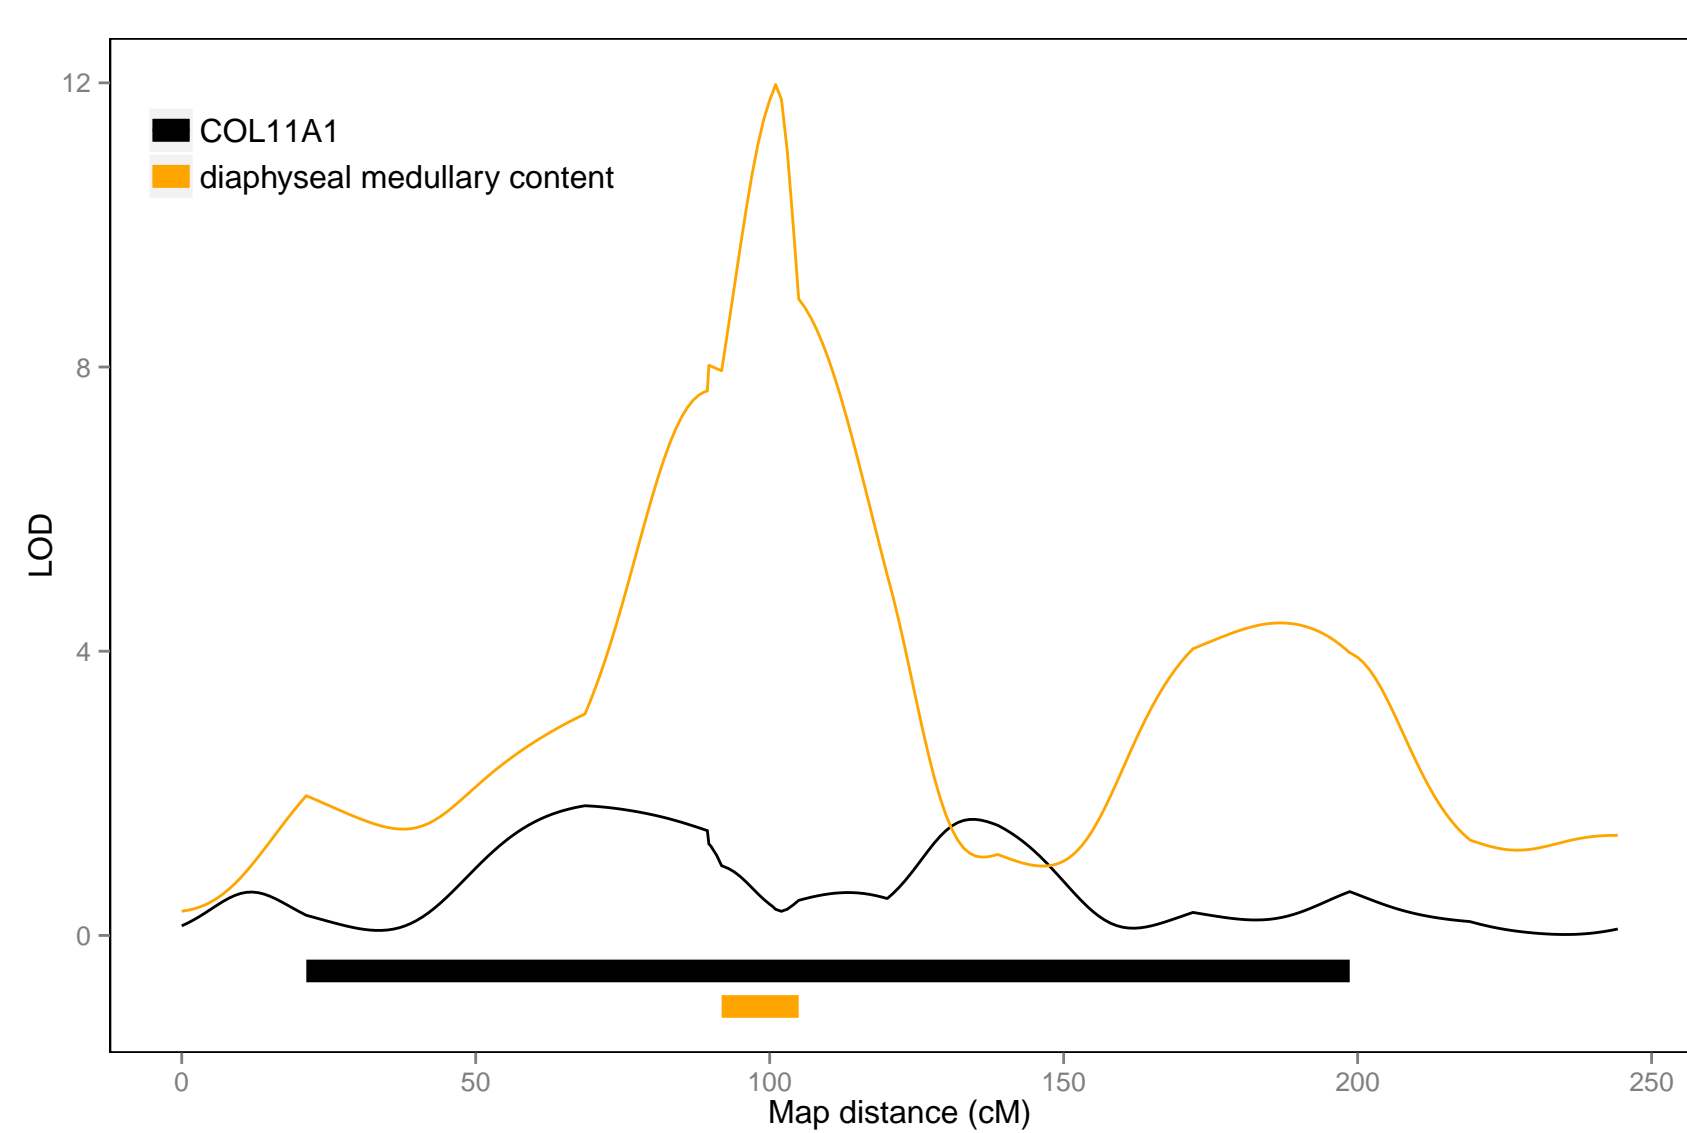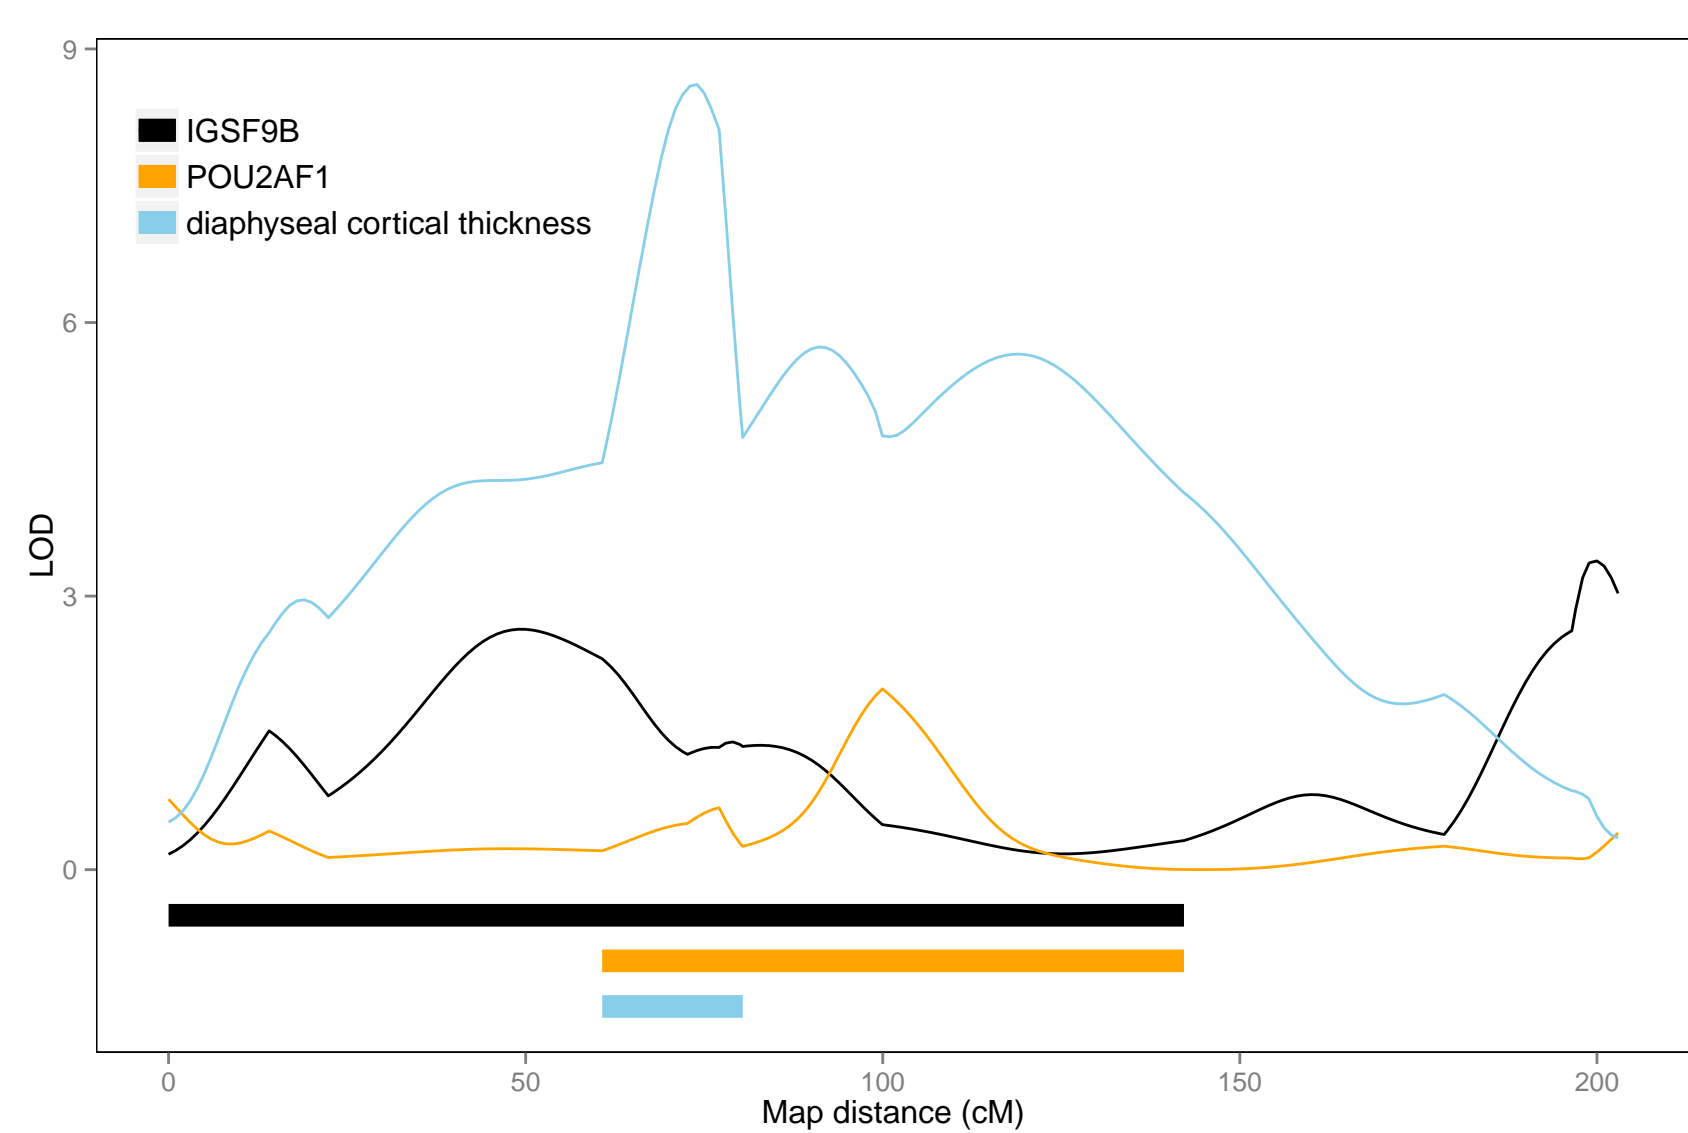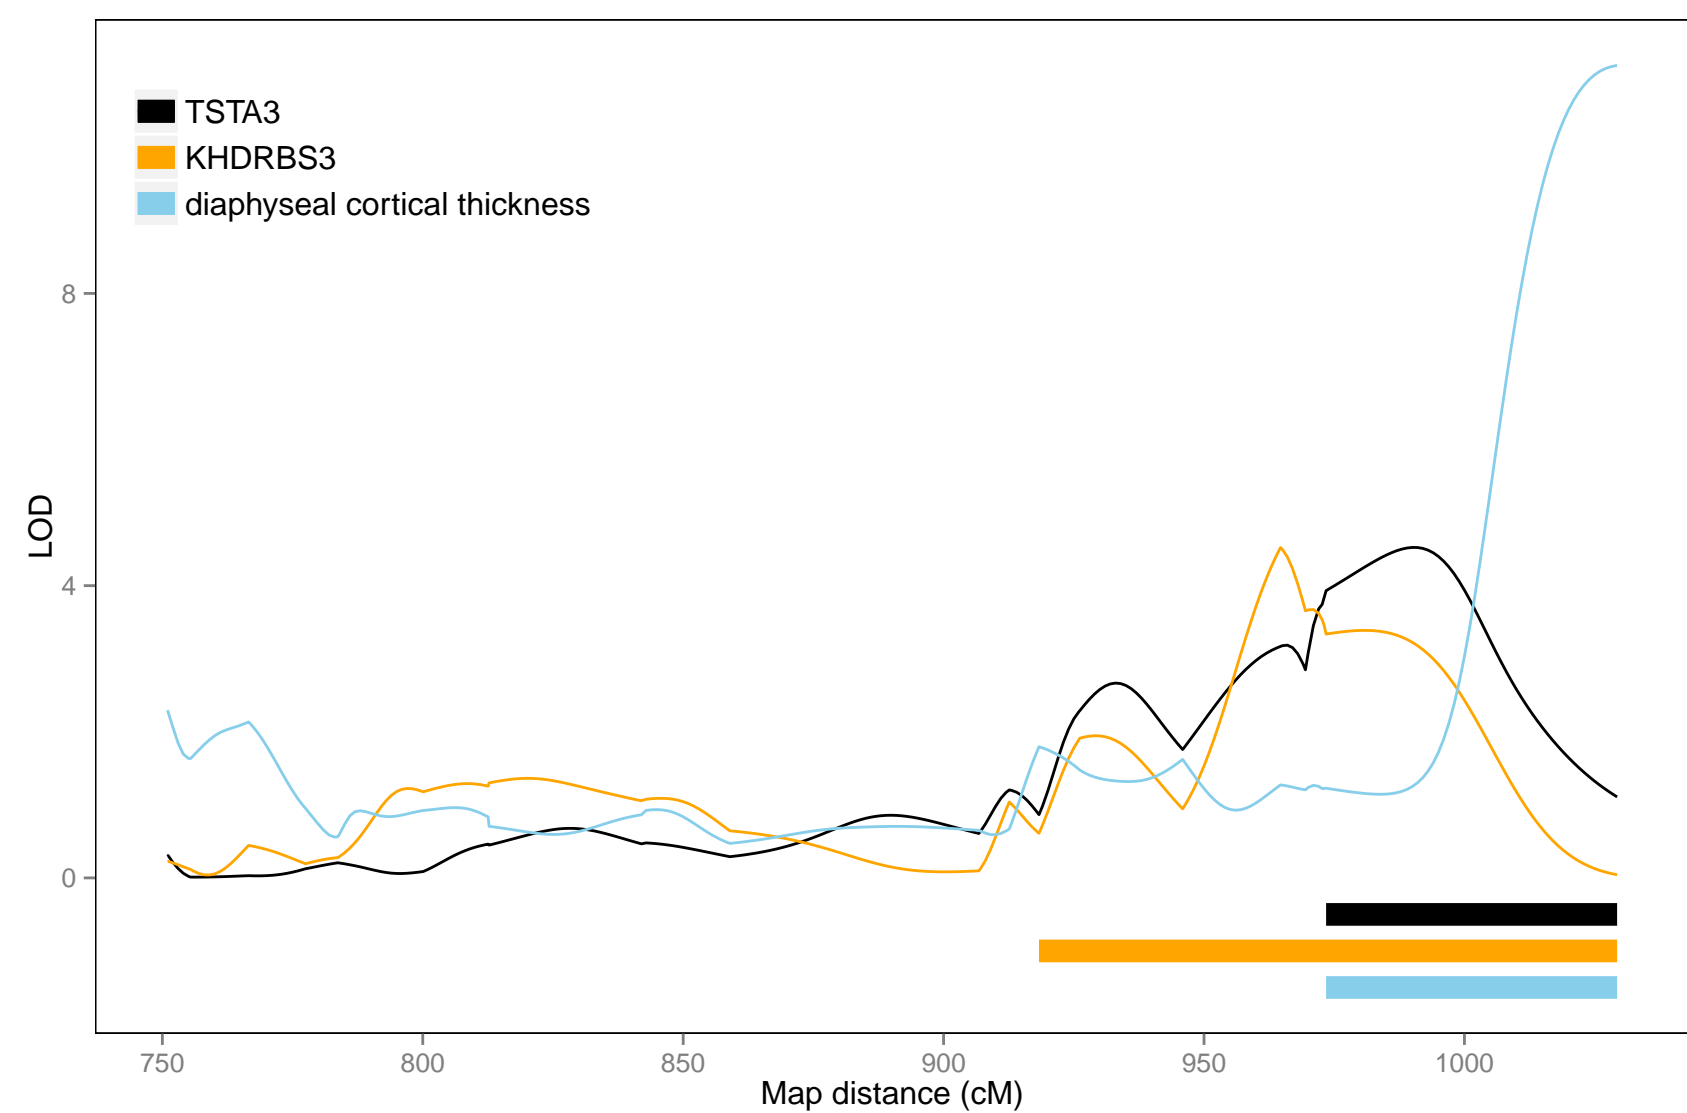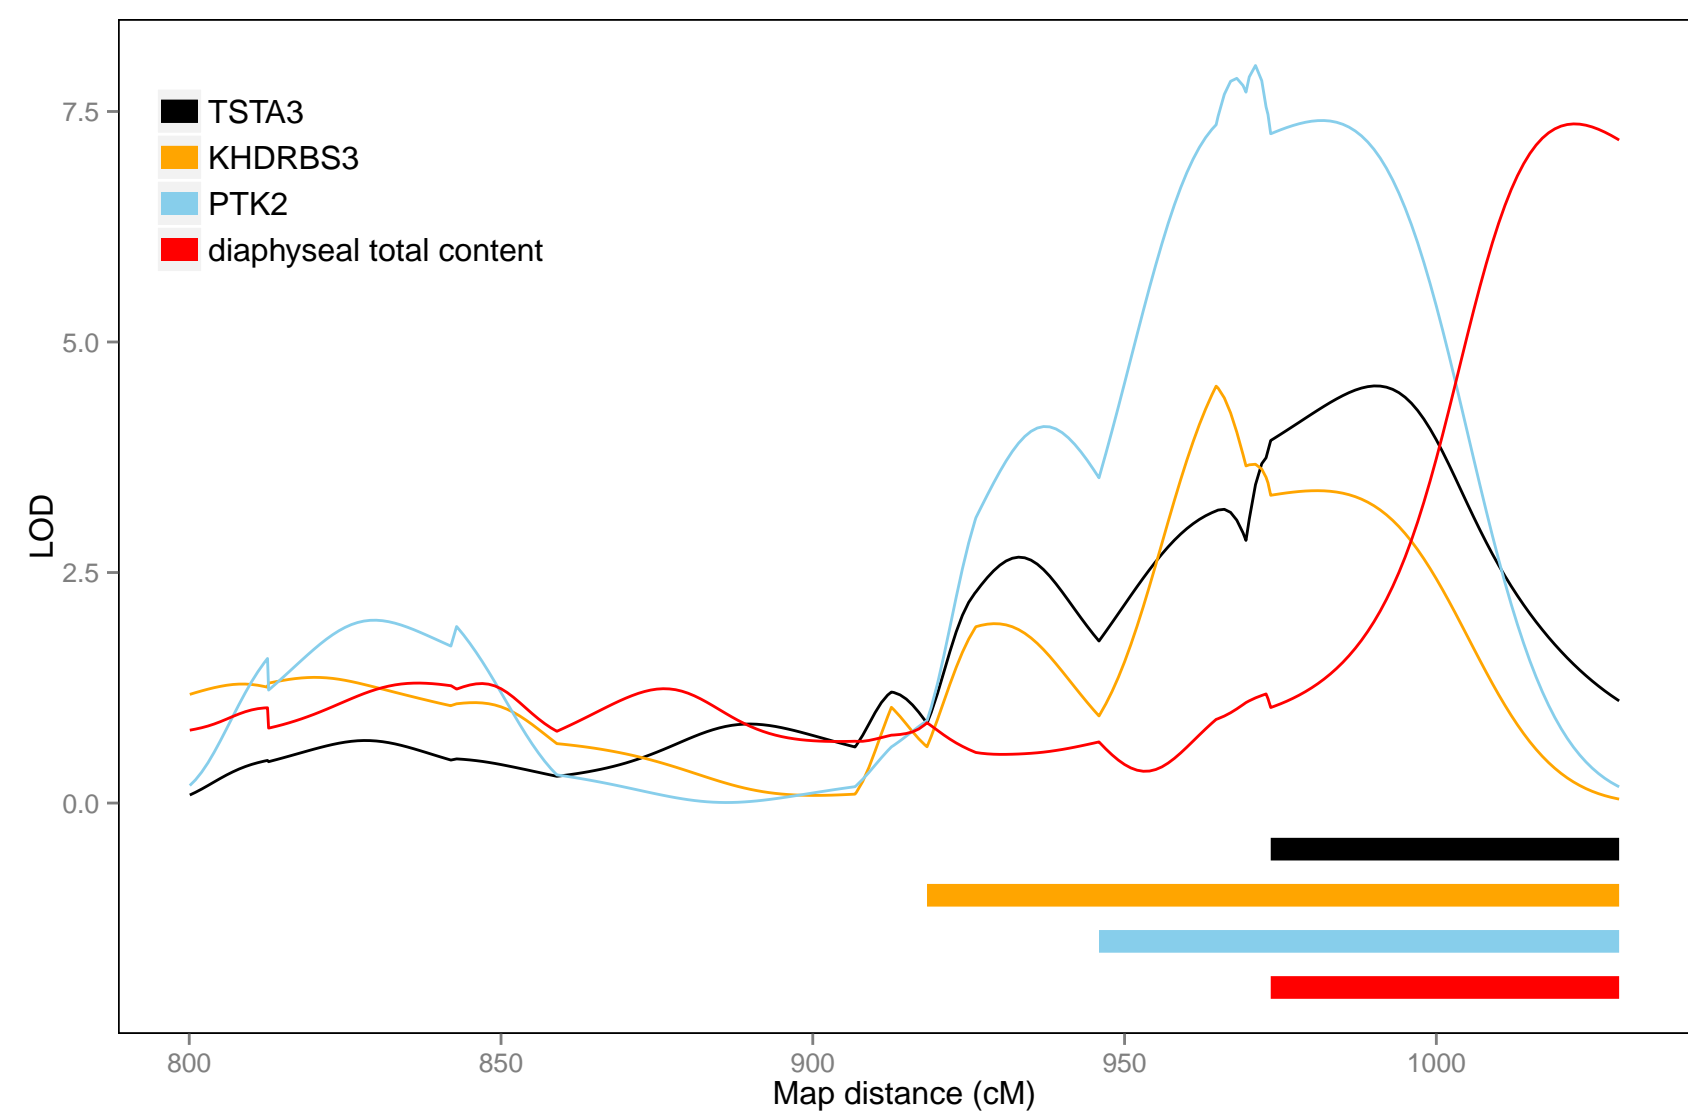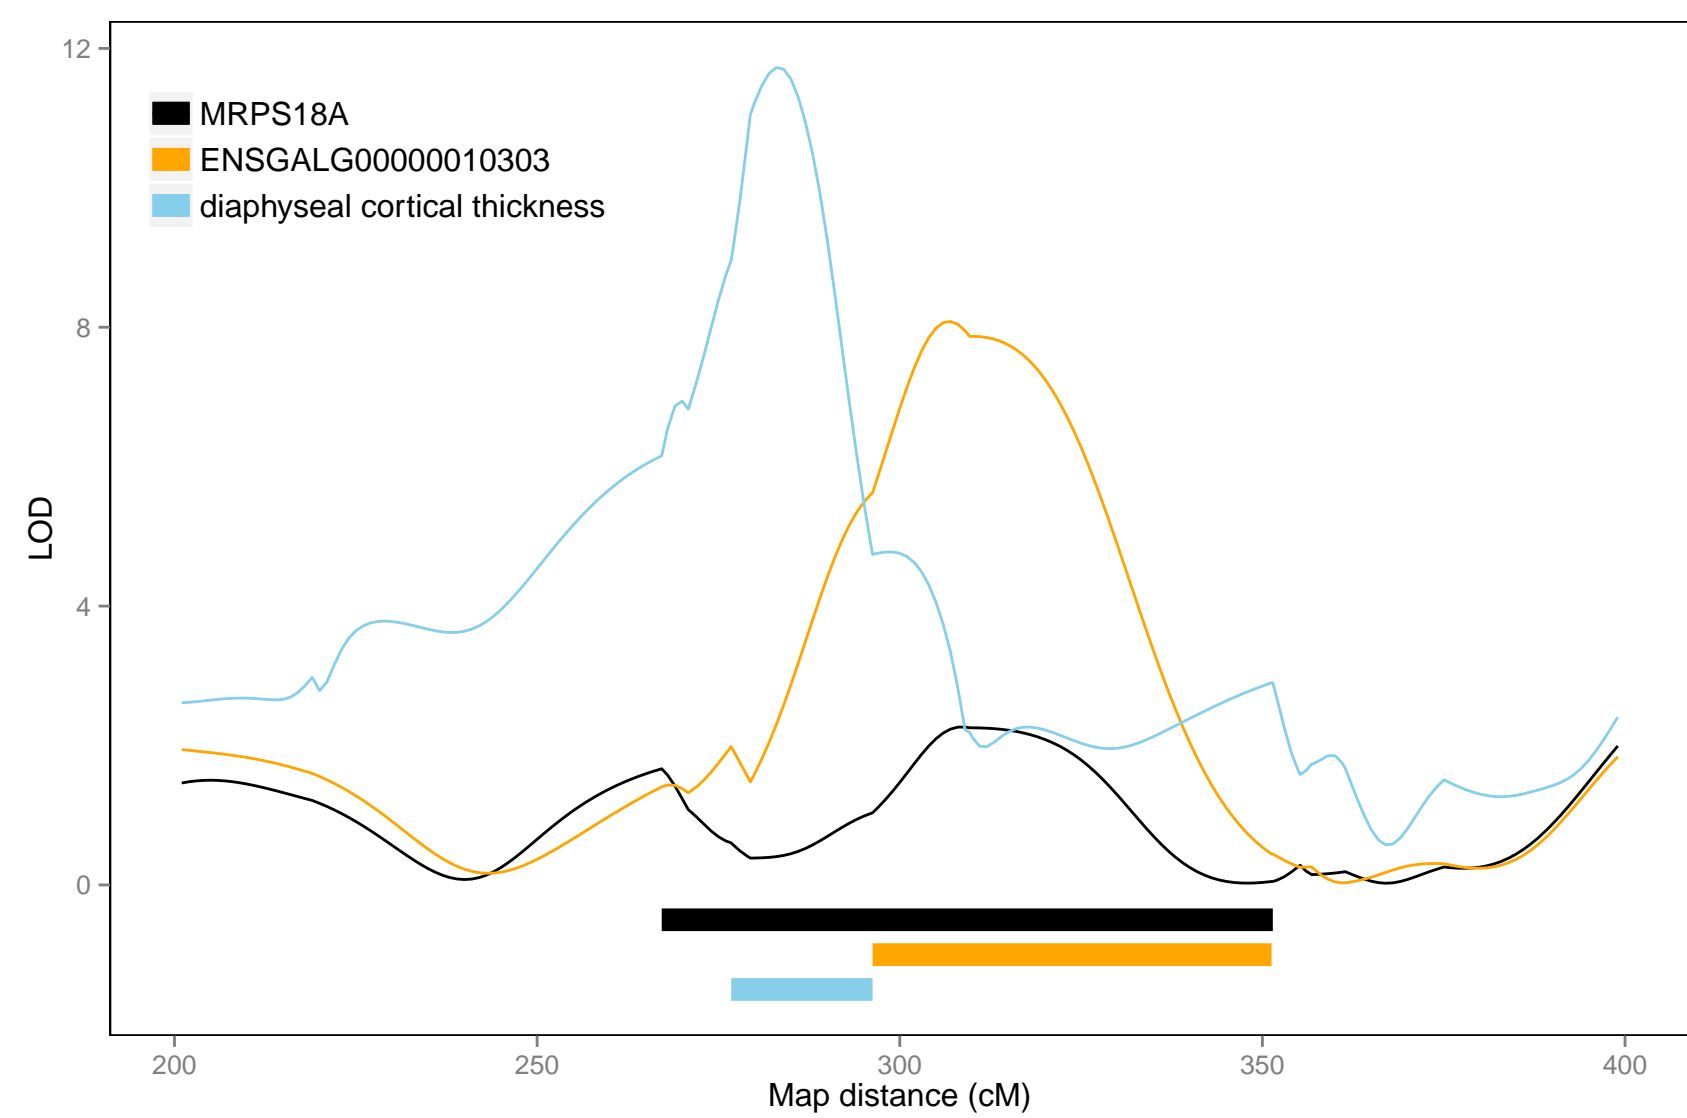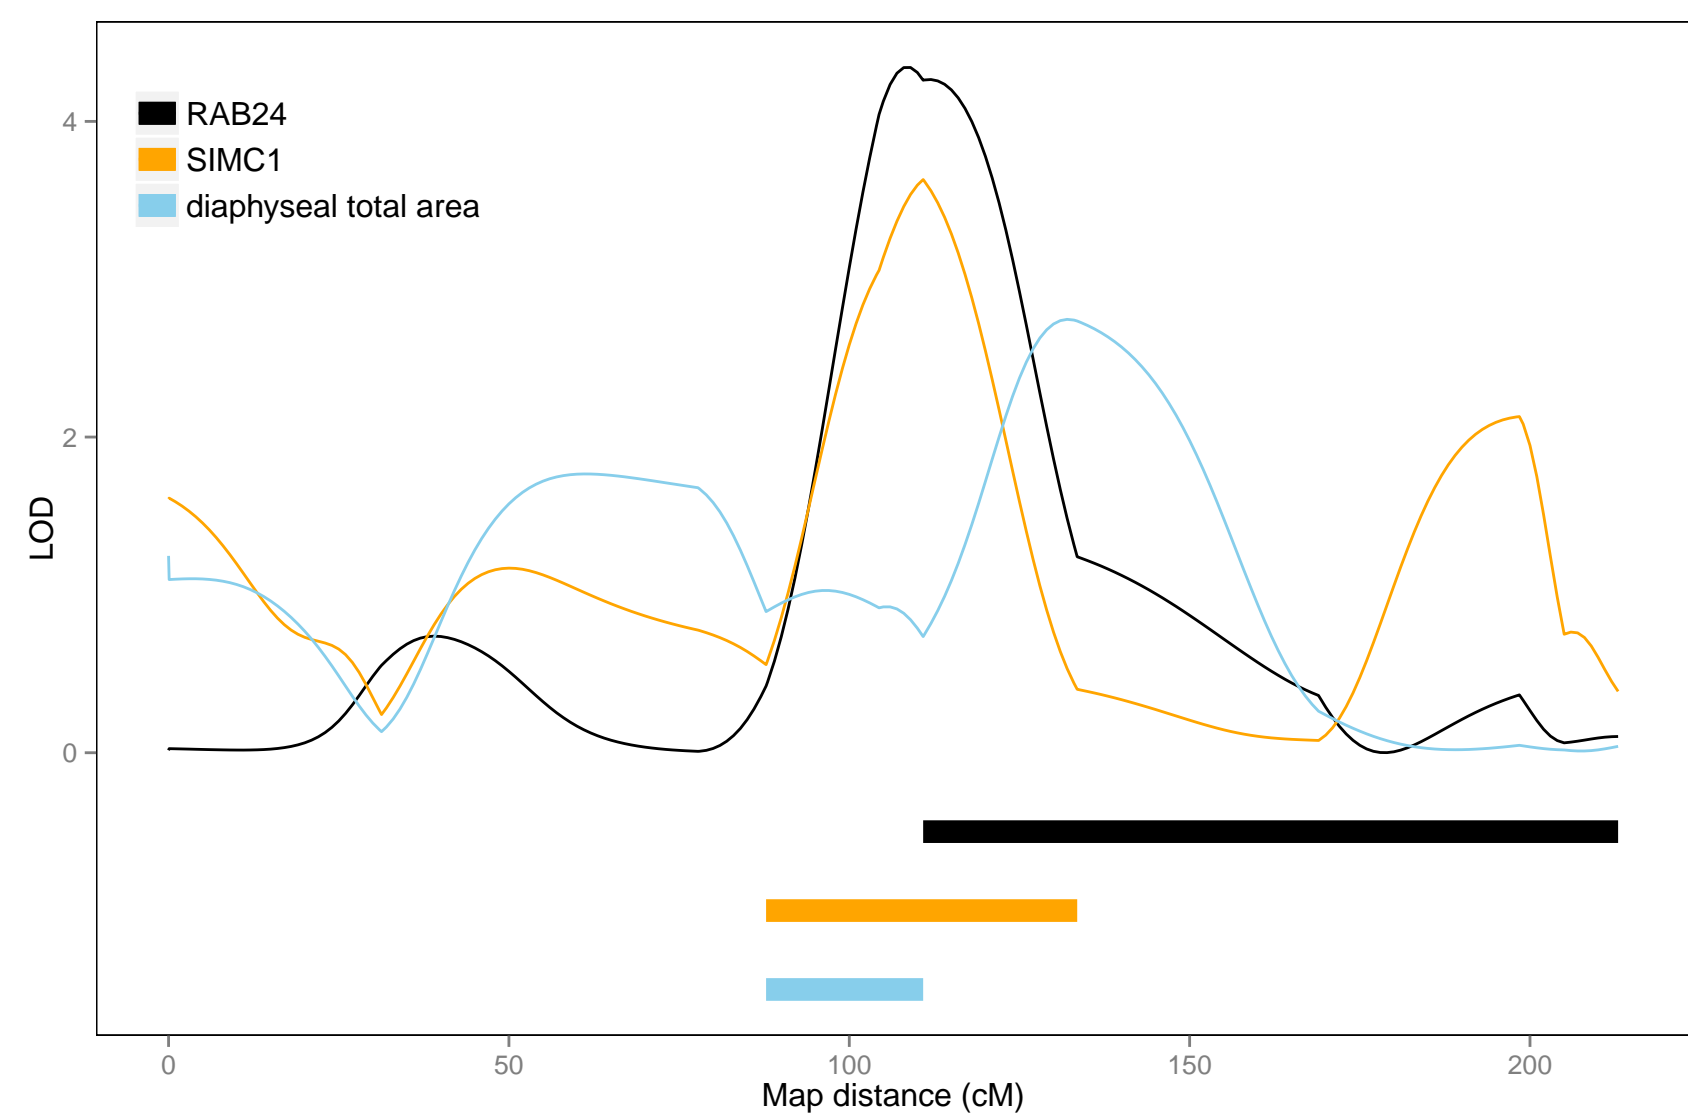

Supplement: pgen.1005250.s008.pdf [file pgen.1005250.s008.pdf]
