# Supplementary material for: Genetic Regulation of Bone Metabolism in the Chicken: Similarities and Differences to Mammalian Systems
Source: PLoS Genet. 2015 May 29;11(5):e1005250. doi: 10.1371/journal.pgen.1005250 (PMC4449198; doi:10.1371/journal.pgen.1005250)
Supplement: S2 Table — (XLS) [file pgen.1005250.s002.xls]

## Sheet: supplementary_table2_raw.txt
Trait	Probeset	Chromosome	eQTL LOD	regression coefficient	p-value for association	Interval start	Interval end
diaphyseal cortical density	603961757F1	1	5.59508	-0.0438836	0.00198218	32995345	38614818
diaphyseal cortical density	ENSGALT00000030673_ENSGALG00000019356	1	4.55744	-0.0543451	0.000603507	36652477	41965335
metaphyseal cortical content	NM_001006238_L3MBTL2	1	2.94119	0.000560955	0.000237035	49952044	56996295
metaphyseal cortical content	ENSGALT00000042137_ENSGALG00000025224	1	5.22297	0.00240431	0.000182942	49952044	56996295
metaphyseal cortical content	603961475F1	1	3.01797	-0.000224418	0.000621865	52692420	58811848
metaphyseal cortical content	ENSGALT00000020762_ENSGALG00000012717	1	3.34782	0.000313446	0.00078143	53791052	61816151
diaphyseal endosteal circumference	NM_001199559_GNS	1	3.77885	0.000283059	0.00161039	27115232	38678514
diaphyseal total density	NM_001199559_GNS	1	3.77885	-0.0364138	0.000175436	27115232	38678514
metaphyseal cortical content	603956890F1	1	2.53093	-0.000501946	2.64246e-05	50526061	57377809
metaphyseal cortical content	ENSGALT00000018392_ENSGALG00000011271	1	2.91401	0.000462666	0.000336454	38614818	52692420
diaphyseal cortical thickness	ENSGALT00000026120_ENSGALG00000016203	2	4.03747	-7.05439e-05	1.40893e-05	138807887	154682550
diaphysal total content	603469577F1	2	8.03586	0.00166739	0.00247067	143872110	154682550
diaphysal total content	ENSGALT00000026120_ENSGALG00000016203	2	4.03747	-0.00128496	5.10833e-05	138807887	154682550
diaphyseal cortical area	ENSGALT00000025982_ENSGALG00000016129	2	3.47852	-0.0006893	0.000297147	154026560	154682550
diaphyseal cortical thickness	ENSGALT00000025982_ENSGALG00000016129	2	3.47852	-7.88709e-05	0.000373678	154026560	154682550
diaphysal total content	ENSGALT00000025982_ENSGALG00000016129	2	3.47852	-0.00188209	1.02261e-05	154026560	154682550
diaphyseal cortical thickness	ENSGALT00000016751_ENSGALG00000010296	3	2.50418	7.16841e-05	0.000389773	21992770	35275260
diaphysal total content	ENSGALT00000016751_ENSGALG00000010296	3	2.50418	0.00146629	0.000197787	21992770	35275260
diaphysal total content	603842139F1	3	4.75827	0.00556506	0.00110198	19002192	25988814
diaphysal total content	ENSGALT00000016037_ENSGALG00000009863	3	7.29898	0.00778161	0.000340824	19002192	25988814
diaphyseal cortical thickness	ENSGALT00000016762_ENSGALG00000010303	3	8.19947	5.38495e-05	0.00164994	29563951	35110420
diaphysal total content	ENSGALT00000016762_ENSGALG00000010303	3	8.19947	0.00110963	0.000872626	29563951	35110420
diaphysal total content	603268630F1	3	3.5966	0.00313304	0.000275684	29563951	35110420
diaphyseal medullary area	603847051F1	3	3.04542	-0.0417482	4.86811e-06	84604760	110258389
diaphyseal endosteal circumference	603256840F1	3	2.88674	-0.00238154	0.000191249	95840955	112250042
diaphyseal medullary area	603961442F1	3	6.68207	0.00234526	0.000532015	110258389	112250042
diaphyseal medullary area	603846396F1	3	6.24844	0.00277891	0.000495182	110258389	112250042
diaphyseal total density	ENSGALT00000032978_ENSGALG00000011657	7	2.85338	-0.0314387	0.0010508	19669162	32468007
diaphyseal total density	603955831F1	7	2.50611	-1.18888	0.000295111	18150085	32468007
diaphyseal total density	ENSGALT00000037752_ENSGALG00000012525	7	3.63513	-0.0310254	9.39778e-05	32468007	37306479
diaphyseal medullary content	603372847F1	8	2.67173	-0.00176108	0.000244361	4126408	25513686
metaphyseal total content	ENSGALT00000030986_ENSGALG00000023738	11	3.84486	-0.00415232	0.00079968	1303458	4341055
metaphyseal total content	603219638F1	11	2.64443	-0.0032247	2.29381e-06	1303458	6450003
metaphyseal total content	ENSGALT00000039720_ENSGALG00000023738	11	3.77474	-0.00480893	0.000595342	1303458	5192111
metaphyseal total content	ENSGALT00000003314_ENSGALG00000002120	11	2.71522	-0.0252295	0.000366268	1303458	5192111
metaphyseal total content	NM_001159371_HYDIN	11	2.69537	-0.0173618	0.000793449	1303458	9911245
metaphyseal total content	ENSGALT00000003789_ENSGALG00000002407	11	2.68325	-0.0174461	0.0010829	1303458	9911245
metaphyseal total content	603372559F1	11	2.6681	-0.00241135	4.72121e-05	1303458	9911245
metaphyseal total content	603470627F1	11	2.77624	0.0076645	9.1582e-05	1303458	9911245
diaphyseal medullary content	603843777F1	13	5.00391	-0.000547754	0.000753388	2424019	12979464
diaphyseal total area	ENSGALT00000004722_ENSGALG00000002984	13	4.18105	-0.000704946	0.000271307	5555459	11093750
diaphyseal medullary area	NM_205499_DBN1	13	2.84598	-0.0138041	0.00300877	4116054	11093750
diaphyseal total area	ENSGALT00000005337_ENSGALG00000003377	13	4.30873	-0.00169713	0.00122256	5555459	11093750
diaphyseal medullary content	NM_001039911_B4GALT7	13	6.20887	-0.000462174	0.00111682	5555459	11093750
diaphyseal medullary content	ENSGALT00000040957_ENSGALG00000024259	13	4.76704	-0.000476545	0.000991042	5555459	11093750
diaphyseal medullary content	ENSGALT00000040958_ENSGALG00000024259	13	5.59516	-0.000455285	0.00146831	5555459	11093750
diaphyseal medullary content	ENSGALT00000040956_ENSGALG00000024259	13	9.97621	-0.000364629	0.00164102	5555459	11093750
metaphyseal total content	NM_001039911_B4GALT7	13	6.20887	-0.00268287	0.00103331	5555459	11093750
metaphyseal total content	ENSGALT00000040957_ENSGALG00000024259	13	4.76704	-0.00289182	0.000467355	5555459	11093750
metaphyseal total content	ENSGALT00000040958_ENSGALG00000024259	13	5.59516	-0.00262529	0.00137453	5555459	11093750
metaphyseal total content	ENSGALT00000040956_ENSGALG00000024259	13	9.97621	-0.0019646	0.00342335	5555459	11093750
diaphyseal medullary content	603470410F1	13	2.7706	-0.000175836	0.00145134	10105991	17914800
metaphyseal total content	603470410F1	13	2.7706	-0.00115597	0.000255492	10105991	17914800
diaphyseal medullary content	NM_204712_CXCL14	13	2.72539	-0.00243419	0.00211138	11093750	17914800
diaphyseal medullary content	ENSGALT00000039854_ENSGALG00000023792	13	3.2929	0.000962488	0.000373215	11093750	17914800
diaphyseal medullary content	NM_205180_FGF1	13	3.42505	0.00080449	1.6143e-05	11093750	17914800
diaphyseal medullary content	ENSGALT00000011880_ENSGALG00000007343	13	2.95509	0.000773253	7.22929e-06	11093750	17914800
metaphyseal total content	603845550F1	14	3.70215	0.0198409	0.000599611	3600574	8716372
metaphyseal total content	603372483F1	14	3.21549	0.00178848	0.00108784	3600574	8716372
metaphyseal total content	ENSGALT00000008381_ENSGALG00000005215	14	4.16151	-0.0417202	2.78432e-06	3600574	8716372
metaphyseal total content	603372494F1	14	3.28692	0.00119424	0.00119068	3600574	8716372
metaphyseal total content	ENSGALT00000007745_ENSGALG00000004851	14	3.83033	0.00480389	0.000302126	3600574	8716372
metaphyseal total content	603845557F1	14	2.96529	0.0172412	0.00111622	3600574	8716372
metaphyseal total content	NM_001044636_RASD1	14	3.58899	0.00231736	0.000927301	3600574	10172497
metaphyseal total content	603957749F1	14	2.99123	-0.0183603	0.000618291	3600574	10172497
metaphyseal total content	603158440F1	14	2.98165	0.00172283	0.000951404	3600574	10172497
metaphyseal total content	ENSGALT00000008442_ENSGALG00000005258	14	6.34278	-0.0140202	0.00122102	3600574	8716372
metaphyseal total content	ENSGALT00000033852_ENSGALG00000005258	14	6.0989	-0.0157299	0.000377239	3600574	8716372
metaphyseal total content	603157791F1	14	3.70232	0.00187741	0.000602251	3600574	8716372
metaphyseal total content	NM_001024834_SSTR5	14	6.15559	-0.0145589	0.000961069	3600574	8716372
metaphyseal total content	ENSGALT00000010426_ENSGALG00000006456	14	3.70564	-0.040644	0.000108111	3600574	10172497
metaphyseal total content	603234824F1	14	2.57961	-0.0617684	0.000683871	8716372	15410006
metaphyseal total content	ENSGALT00000011913_ENSGALG00000007366	14	2.92236	-0.260329	0.000203863	8716372	15410006
metaphyseal total content	603234640F1	14	2.50983	0.0034103	0.000990372	8716372	15410006
diaphyseal cortical thickness	ENSGALT00000001528_ENSGALG00000001031	19	4.269	0.00208459	0.000349492	192210	3642623
diaphyseal cortical thickness	ENSGALT00000002205_ENSGALG00000001450	24	3.43403	0.00334093	0.000686914	1135292	4804919
diaphyseal cortical thickness	ENSGALT00000035447_ENSGALG00000021902	24	2.87453	0.00959297	0.000150187	1135292	3041589
diaphyseal cortical thickness	NM_204175_POU2AF1	24	2.61591	0.0001396	0.00413636	2603372	4804919
diaphyseal cortical thickness	ENSGALT00000035204_ENSGALG00000021693	28	2.70914	0.000141506	0.00109675	991556	2008685
diaphyseal cortical thickness	603954592F1	28	2.64962	-4.93267e-05	0.00207121	991556	2008685
diaphyseal cortical thickness	603958702F1	28	5.17209	0.000809136	0.000621105	991556	2818024
diaphyseal cortical thickness	ENSGALT00000001890_ENSGALG00000001245	28	15.5806	0.000259492	0.00242553	1608048	2818024
